# Supplementary material
Source: MDPI journal article supplement (https://www.mdpi.com/2073-445X/13/3/290)
Supplement: s1 [file land-2810644-supplementary.xlsx]

## Sheet: Metadata
Sheet name	Description of data
Datasheet1_VR_Park_Ratings	Seven UK parks were recreated in virtual reality. Participants were asked to rate their perceived restorative benefit based on a short series of 5 Likert scale questions. RB1=there is a lot of explore and discover here, RB2=this place is a refuge from unwanted distractions, RB3=I would be able to rest and recover here, RB4=I like this environment, and RB5=I feel safe in this park. See main text f…
Datasheet2_Physical_Park_Rating	These data are derived from Wood et al. (2018), where the same short restorative benefit survey was used when asking park visitors about their perceptions of the parks. Surveys were carried out in the parks themselves. The park numbers refer to the same parks as in Datasheet1. Abbreviations of questions in the column headers are the same as in Datasheet1. See main text for more detailed methods.
Datasheet3_Tree_Experiment	Ten UK parks werecreated in virtual reality (including the seven referred to in Datasheets 1 and 2). As with Datasheets 1 and 2, a series of participants were asked to rate their perceived restorative benefit from the parks. In this case, each park has three "tree treatments" corresponding to "0" = zero trees, "1" = original tree numbers, and "2" = double the original tree numbers. See main text …

## Sheet: Datasheet1_VR_Park_Ratings
Participant	Park	RB1	RB2	RB3	RB4	RB5
1	1	2	1	2	2	3
1	2	2	1	3	2	3
1	3	4	4	4	4	4
1	4	4	3	3	3	3
1	5	5	5	4	5	5
1	6	5	5	5	5	5
1	7	3	4	5	4	4
2	1	2	1	2	3	3
2	2	3	2	3	4	3
2	3	4	4	4	4	4
2	4	4	4	4	3	3
2	5	5	5	5	5	4
2	6	5	5	5	5	5
2	7	3	4	4	3	4
3	1	2	2	3	3	2
3	2	3	3	3	3	3
3	3	3	4	4	3	4
3	4	5	4	5	4	4
3	5	5	5	5	4	5
3	6	5	5	5	5	5
3	7	4	4	4	3	4
4	1	1	1	2	2	2
4	2	3	3	3	3	3
4	3	4	5	5	5	5
4	4	4	4	4	4	4
4	5	5	5	5	5	5
4	6	4	3	3	3	4
4	7	4	4	4	4	4
5	1	3	3	3	2	3
5	2	4	3	2	2	2
5	3	4	4	4	4	5
5	4	4	5	5	4	5
5	5	5	5	5	5	5
5	6	5	5	5	5	5
5	7	4	4	3	4	3
6	1	1	3	2	2	3
6	2	2	2	2	2	3
6	3	2	3	3	3	3
6	4	2	2	3	3	3
6	5	4	4	4	4	3
6	6	4	3	3	3	4
6	7	3	3	4	4	4
7	1	3	3	2	4	4
7	2	3	2	2	4	4
7	3	2	2	2	3	3
7	4	3	4	3	4	4
7	5	4	4	5	5	5
7	6	4	3	3	3	4
7	7	4	3	3	4	4
8	1	2	4	3	4	4
8	2	4	3	4	4	4
8	3	2	2	2	3	3
8	4	3	3	3	4	4
8	5	5	5	5	5	4
8	6	4	4	5	5	4
8	7	3	3	4	4	4
9	1	2	4	3	3	4
9	2	4	2	1	2	4
9	3	4	4	4	4	4
9	4	4	4	5	4	4
9	5	5	4	5	5	3
9	6	5	5	5	5	2
9	7	4	3	3	4	4
10	1	2	2	2	1	3
10	2	3	2	1	2	3
10	3	2	3	2	2	4
10	4	4	4	3	3	4
10	5	5	4	4	4	4
10	6	4	3	3	3	4
10	7	3	2	2	2	4

## Sheet: Datasheet2_Physical_Park_Rating
Participant	Park	RB1	RB2	RB3	RB4	RB5
1	1	1	3	3	5	5
2	1	1	3	3	3	2
3	1	4	4	4	4	3
4	1	4	1	1	4	5
5	1	2	3	3	3	5
6	2	3	4	4	4	3
7	2	1	4	4	4	3
8	2	2	2	2	4	1
9	2	4	5	5	4	3
10	2	3	3	3	3	3
11	2	2	5	5	5	3
12	2	4	3	3	3	3
13	2	4	3	3	4	3
14	2	1	1	3	3	5
15	2	4	5	3	4	3
16	2	3	4	5	5	5
17	2	3	4	5	5	5
18	3	1	5	4	5	3
19	3	4	1	4	5	5
20	3	4	5	5	5	5
21	3	1	3	4	3	1
22	3	5	5	5	5	5
23	3	2	4	4	4	5
24	3	5	4	5	3	3
25	3	1	2	4	4	5
26	3	2	4	4	5	4
27	3	3	4	4	4	5
28	3	2	2	2	2	4
29	3	1	2	3	4	4
30	3	3	3	4	4	4
31	3	2	3	3	3	1
32	3	3	3	3	5	4
33	3	5	5	5	5	5
34	3	5	3	5	5	3
35	4	1	1	1	2	1
36	4	5	5	5	5	5
37	4	4	3	3	4	4
38	4	4	5	5	4	4
39	4	3	1	1	3	3
40	4	1	5	5	4	5
41	4	3	3	3	4	5
42	5	3	4	4	5	5
43	5	3	4	4	5	5
44	5	4	5	5	4	5
45	5	4	1	1	3	4
46	5	4	1	1	3	2
47	5	4	3	3	3	3
48	5	4	5	5	4	4
49	5	4	5	5	3	4
50	5	3	4	4	4	5
51	5	3	4	4	3	5
52	5	3	3	3	5	4
53	5	2	3	3	3	4
54	5	5	5	5	5	5
55	5	5	5	5	1	1
56	5	4	5	4	4	5
57	6	5	5	5	5	5
58	6	5	5	5	5	2
59	6	3	5	5	5	4
60	6	3	4	4	4	5
61	6	4	5	5	5	3
62	6	3	5	5	4	3
63	6	3	4	4	3	5
64	6	4	5	5	5	2
65	6	3	4	4	5	1
66	6	2	5	5	4	5
67	6	4	5	5	4	4
68	6	4	5	5	4	5
69	6	3	4	4	4	5
70	6	3	5	5	4	4
71	6	5	5	5	4	4
72	7	2	1	1	4	1
73	7	3	3	4	4	5
74	7	2	1	1	1	1
75	7	5	4	4	5	4
76	7	2	4	2	3	2
77	7	1	3	1	2	1

## Sheet: Datasheet3_Tree_Experiment
Participant	Park	Tree Treatment	RB1	RB2	RB3	RB4	RB5
1	1	0	1	1	1	1	2
1	2	0	3	3	2	2	3
1	2	2	3	4	3	4	4
1	3	0	1	1	2	2	3
1	3	0	1	1	2	2	3
1	4	2	4	4	4	4	4
1	4	2	4	4	4	4	4
1	7	0	2	3	2	1	2
1	7	1	3	3	3	2	3
1	7	2	3	4	4	3	3
2	1	0	1	1	1	1	2
2	1	1	1	2	1	2	3
2	1	2	2	2	1	2	2
2	1	2	2	2	1	2	2
2	3	2	3	2	3	3	3
2	3	2	3	2	3	3	3
2	6	0	2	2	2	1	3
2	6	2	3	2	2	2	2
2	7	0	2	2	1	1	2
2	7	0	1	1	1	1	2
3	1	1	2	2	3	3	4
3	1	1	2	2	3	3	4
3	2	0	1	1	1	1	3
3	3	1	3	3	3	4	4
3	3	1	3	3	3	4	4
3	4	0	1	1	1	1	3
3	5	1	3	4	4	4	5
3	6	0	2	1	1	2	3
3	6	1	4	3	3	3	4
3	7	1	2	3	3	3	4
4	2	0	2	1	1	1	3
4	2	0	2	1	1	1	3
4	2	2	3	2	2	2	3
4	3	0	1	1	1	1	2
4	5	0	1	1	2	1	2
4	5	1	2	3	2	2	3
4	5	2	3	3	3	3	3
4	5	2	3	3	3	3	3
4	6	2	4	4	3	4	4
4	7	1	4	3	3	2	3
5	1	2	1	2	2	3	4
5	2	1	2	2	1	2	5
5	2	1	2	2	1	2	5
5	2	2	3	2	3	3	4
5	3	1	2	2	2	3	3
5	4	1	3	3	4	4	4
5	4	2	4	4	5	4	4
5	4	2	4	4	5	4	4
5	5	2	5	5	5	4	4
5	6	1	4	4	5	4	4
6	2	1	2	3	2	2	2
6	2	1	2	3	2	2	2
6	3	2	3	4	3	4	4
6	4	0	1	1	1	1	1
6	4	1	3	4	4	3	3
6	5	1	5	5	5	5	5
6	6	0	2	1	1	1	1
6	6	2	5	4	4	4	4
6	7	0	2	1	1	1	1
6	7	1	3	2	2	2	3
7	1	0	2	1	1	1	3
7	1	0	2	1	1	1	3
7	1	2	1	2	3	2	3
7	2	2	4	3	2	3	3
7	3	1	3	3	4	4	4
7	4	0	1	2	2	2	3
7	5	2	5	5	5	5	4
7	6	1	3	3	2	3	3
7	7	0	2	3	2	2	4
7	7	2	5	4	5	5	5
8	3	0	2	2	2	2	4
8	4	0	1	2	2	2	3
8	4	2	3	3	3	3	4
8	5	0	3	3	2	2	3
8	5	2	5	5	5	5	5
8	6	0	2	3	3	2	4
8	6	0	2	3	3	2	5
8	6	1	4	4	4	4	5
8	6	2	5	5	5	5	5
8	7	2	4	4	3	3	4
9	1	1	3	2	2	4	3
9	2	0	2	2	2	3	2
9	2	1	4	3	2	2	3
9	3	0	2	2	3	3	3
9	3	2	4	5	5	5	5
9	4	0	2	2	2	2	2
9	4	1	4	3	3	3	3
9	4	1	4	3	3	3	3
9	5	0	3	4	4	4	4
9	7	2	5	5	5	5	5
10	1	0	1	2	1	2	2
10	1	2	3	3	3	3	3
10	2	2	5	4	5	5	4
10	3	1	3	4	4	4	4
10	4	1	4	4	4	4	4
10	5	0	3	4	3	3	2
10	5	0	3	4	3	3	2
10	5	1	5	5	5	5	5
10	7	1	5	3	4	4	4
10	7	2	5	5	5	5	5
11	1	1	2	2	3	3	3
11	2	0	2	1	2	1	1
11	2	1	3	2	3	2	2
11	3	0	1	2	2	2	3
11	3	2	4	4	5	5	5
11	5	1	5	5	5	5	5
11	5	2	5	5	5	5	5
11	6	1	4	4	4	4	4
11	6	2	4	5	5	5	5
11	7	0	2	2	2	3	3
12	1	2	1	2	1	2	4
12	3	1	3	4	4	4	4
12	3	2	4	5	5	4	4
12	4	2	4	4	3	3	4
12	5	1	5	5	5	5	5
12	6	0	2	2	3	3	4
12	6	1	4	4	3	3	4
12	7	0	2	2	1	2	4
12	7	1	3	2	3	2	4
12	7	2	4	3	3	3	4
13	1	2	2	2	2	2	4
13	1	2	2	2	2	2	4
13	3	2	4	3	4	4	4
13	4	0	2	1	2	2	3
13	4	1	3	3	3	4	3
13	4	2	4	4	4	5	4
13	6	0	2	1	2	2	3
13	6	1	5	2	4	4	5
13	7	0	3	1	2	2	3
13	7	2	4	4	4	4	4
14	1	1	2	2	2	2	2
14	2	1	3	2	2	3	2
14	3	1	3	3	3	3	4
14	4	2	3	4	4	3	2
14	4	2	3	4	4	3	2
14	4	2	3	4	4	3	2
14	5	0	4	3	3	4	4
14	5	1	5	5	5	5	5
14	6	0	2	2	2	2	2
14	7	2	4	4	4	4	4
15	1	1	2	2	2	2	2
15	2	0	2	1	2	2	2
15	3	1	3	3	3	3	4
15	4	0	2	2	3	2	4
15	5	0	3	3	3	4	4
15	5	1	5	5	5	5	5
15	5	2	5	5	5	5	5
15	6	1	3	4	4	4	4
15	6	1	3	4	4	4	4
15	6	2	4	5	5	5	5
16	2	0	2	2	1	2	1
16	2	1	3	3	2	3	3
16	4	0	2	2	2	2	1
16	5	0	2	3	4	4	3
16	5	1	4	4	4	5	4
16	6	0	2	2	3	2	3
16	6	2	5	4	4	4	3
16	6	2	5	4	4	4	3
16	7	1	3	2	4	2	3
16	7	1	3	2	4	2	3
17	1	0	1	1	1	2	3
17	1	1	1	2	2	2	2
17	1	2	2	3	3	3	3
17	2	1	3	2	1	2	2
17	2	2	4	3	2	3	3
17	2	2	4	3	2	3	3
17	2	2	4	3	2	3	3
17	3	0	2	2	3	3	4
17	5	2	5	5	5	5	5
17	6	2	4	4	4	4	4
18	2	0	2	1	2	2	3
18	3	0	2	2	3	3	4
18	3	0	2	2	3	3	4
18	3	1	3	3	3	3	4
18	4	0	2	2	2	2	3
18	4	1	3	3	3	3	4
18	5	2	5	5	5	5	5
18	5	2	5	5	5	5	5
18	7	0	2	2	2	2	3
18	7	1	3	4	3	4	4
19	1	0	1	1	1	1	2
19	1	1	1	3	5	3	5
19	2	2	5	5	5	5	5
19	4	0	1	1	1	1	3
19	4	1	1	1	3	1	3
19	6	0	3	3	1	1	2
19	6	0	3	5	5	5	5
19	6	1	4	4	2	3	4
19	6	2	5	5	5	5	5
19	7	0	3	3	3	3	5
20	1	1	2	2	2	2	2
20	1	2	2	3	2	3	4
20	2	0	2	2	1	2	3
20	3	0	1	2	2	2	2
20	3	1	2	3	3	3	3
20	3	2	3	4	3	4	3
20	4	1	3	3	3	2	4
20	5	0	4	3	3	4	3
20	7	0	3	2	2	2	4
20	7	1	4	3	4	3	4
21	1	0	2	2	1	2	4
21	1	0	2	2	1	2	4
21	1	1	2	2	1	3	4
21	2	1	2	1	1	3	4
21	2	2	4	3	2	3	4
21	3	2	5	5	5	4	4
21	3	2	5	5	5	4	4
21	4	1	4	4	2	3	4
21	5	1	5	5	4	4	4
21	7	2	4	4	2	4	4
22	8	0	1	2	1	1	2
22	8	1	4	2	4	3	5
22	8	2	4	4	3	4	4
22	9	0	2	2	2	1	3
22	9	1	4	4	4	3	4
22	9	2	4	4	4	4	4
22	10	0	1	3	3	3	4
22	10	1	1	5	3	4	3
22	10	2	3	5	4	5	5
23	8	0	2	2	2	2	2
23	8	1	4	4	4	3	3
23	8	2	4	4	4	4	4
23	9	0	4	3	3	2	3
23	9	1	4	3	3	3	3
23	9	2	4	3	4	3	3
23	10	0	3	2	2	2	1
23	10	1	2	3	3	2	3
23	10	2	4	4	4	4	3
24	8	0	1	2	2	1	3
24	8	1	3	3	3	3	4
24	8	2	4	3	3	4	3
24	9	0	2	2	2	2	3
24	9	1	3	2	2	3	3
24	9	2	4	3	4	4	3
24	10	0	1	3	3	3	4
24	10	1	2	3	3	2	3
24	10	2	2	3	4	3	4
25	8	0	2	2	2	3	4
25	8	1	4	4	3	4	4
25	8	2	3	3	2	3	4
25	9	0	3	3	2	3	4
25	9	1	3	2	2	1	2
25	9	2	3	3	3	3	5
25	10	0	1	2	2	2	4
25	10	1	2	2	2	4	4
25	10	2	2	3	3	3	4
26	8	0	3	1	1	3	5
26	8	1	4	3	3	4	4
26	8	2	4	3	4	4	4
26	9	0	4	2	2	2	2
26	9	1	4	4	4	4	4
26	9	2	5	4	4	4	4
26	10	0	1	3	3	3	4
26	10	1	2	3	3	3	4
26	10	2	2	4	4	3	4
27	8	0	2	2	2	3	3
27	8	1	2	3	3	3	4
27	8	2	2	3	3	4	4
27	9	0	2	2	3	3	4
27	9	1	2	2	3	3	4
27	9	2	2	3	3	4	4
27	10	0	1	2	3	3	3
27	10	1	1	2	2	3	4
27	10	2	1	3	3	4	4
28	8	0	4	3	3	5	4
28	8	1	4	4	3	5	4
28	8	2	4	3	4	5	4
28	9	0	3	2	3	3	4
28	9	1	3	3	3	4	4
28	9	2	3	4	3	4	5
28	10	0	1	1	2	2	3
28	10	1	1	2	2	3	4
28	10	2	1	2	2	3	4
29	8	0	2	1	1	2	4
29	8	1	4	2	4	4	4
29	8	2	5	4	4	4	4
29	9	0	5	2	2	2	4
29	9	1	5	2	2	4	4
29	9	2	5	4	4	4	4
29	10	0	1	4	4	2	5
29	10	1	1	4	5	4	5
29	10	2	2	5	5	5	5
30	8	0	2	2	2	2	3
30	8	1	2	2	3	3	4
30	8	2	2	3	2	2	3
30	9	0	2	2	2	2	3
30	9	1	3	3	4	4	4
30	9	2	4	3	4	4	4
30	10	0	1	2	2	2	2
30	10	1	1	3	3	3	3
30	10	2	1	3	2	3	2
31	8	0	5	4	3	5	5
31	8	1	5	5	4	5	5
31	8	2	5	5	4	5	5
31	9	0	5	4	4	5	4
31	9	1	5	5	5	5	5
31	9	2	5	5	5	5	4
31	10	0	5	3	4	5	4
31	10	1	5	3	4	5	4
31	10	2	5	5	5	5	4
